# Supplementary material
Source: PubMed Central journal article supplement (PMC8183414)

# Source Data for Figure 5

## Figure 5A

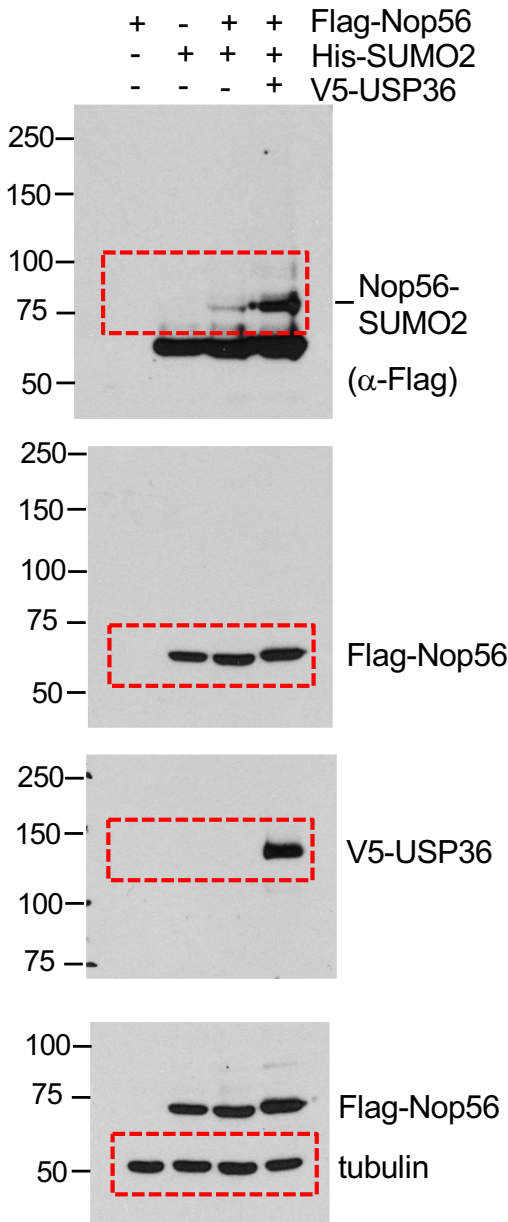

## Figure 5B

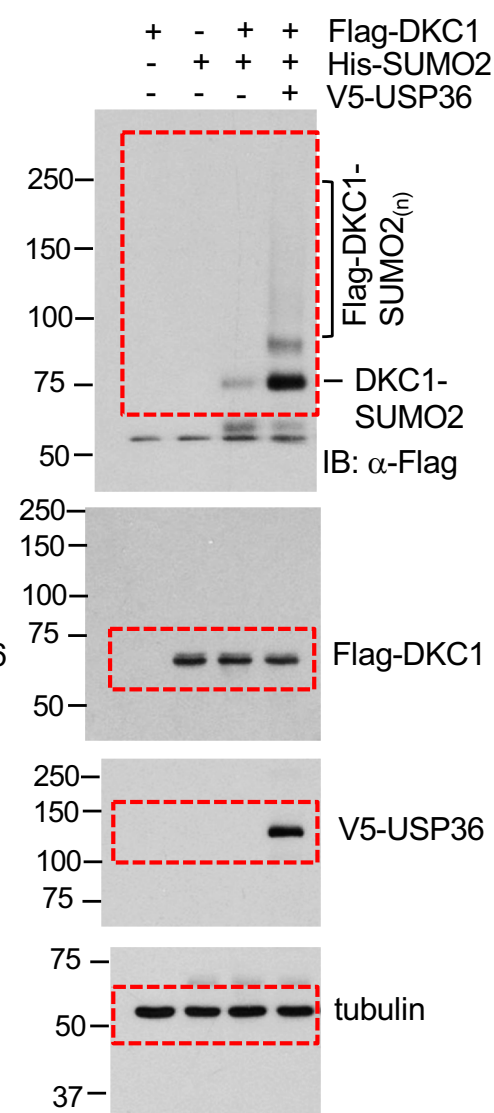

## Figure 5C

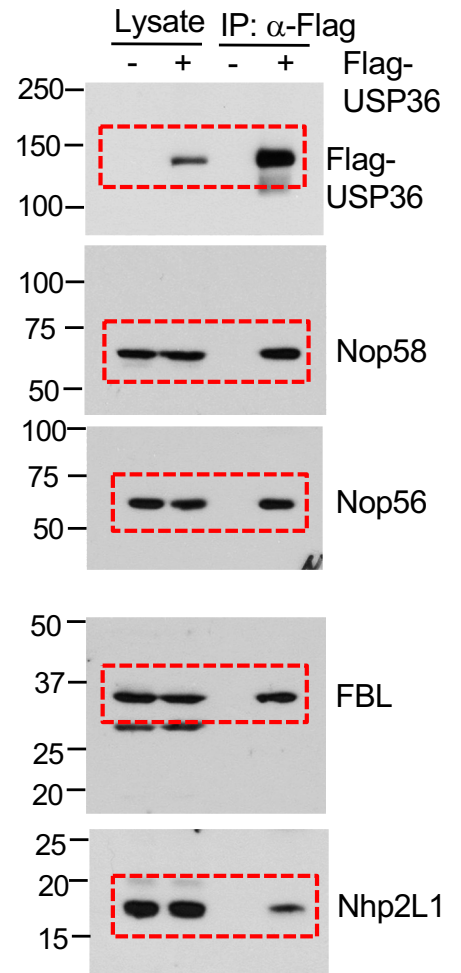

## Figure 5D

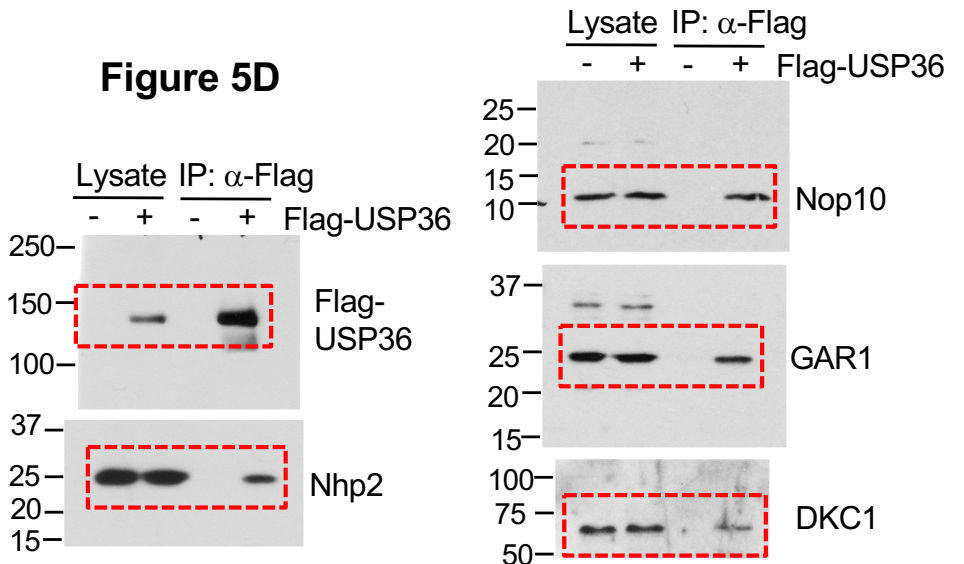

# Source Data for Figure 5

## Figure 5E

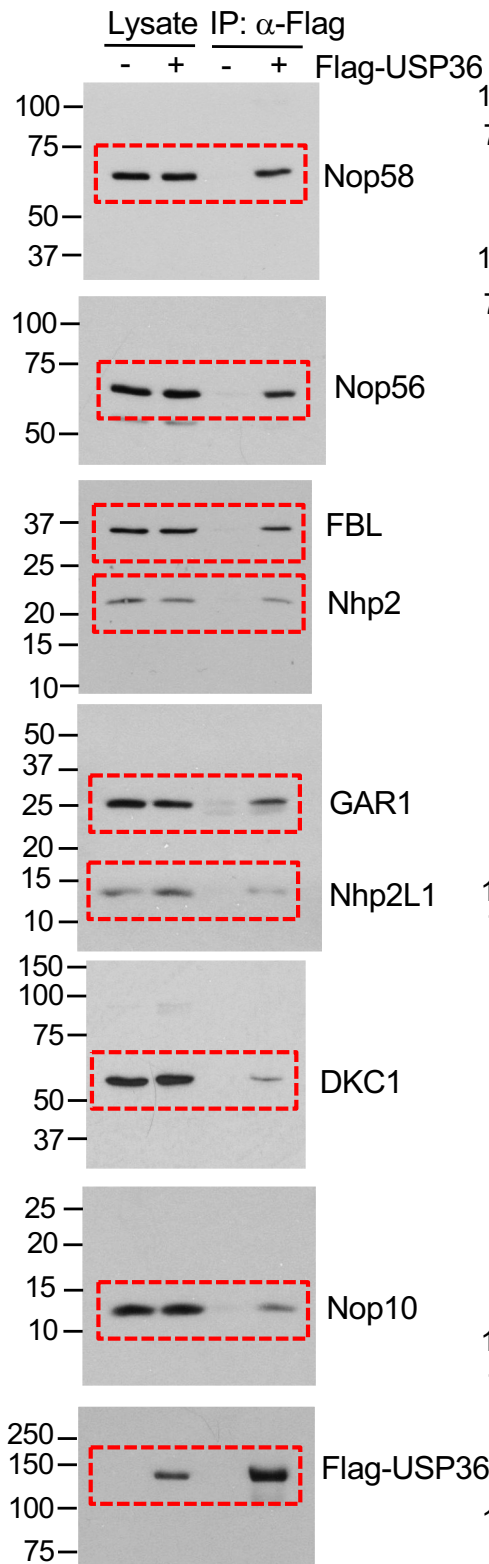

## Figure 5F

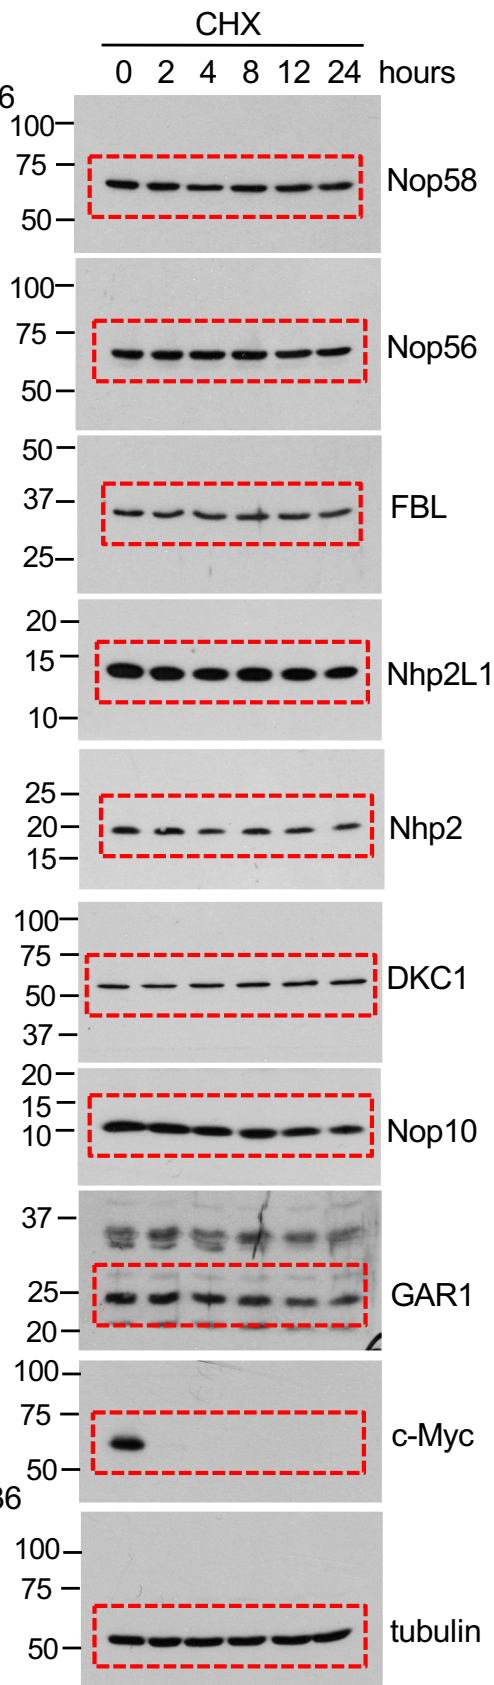

## Figure 5G

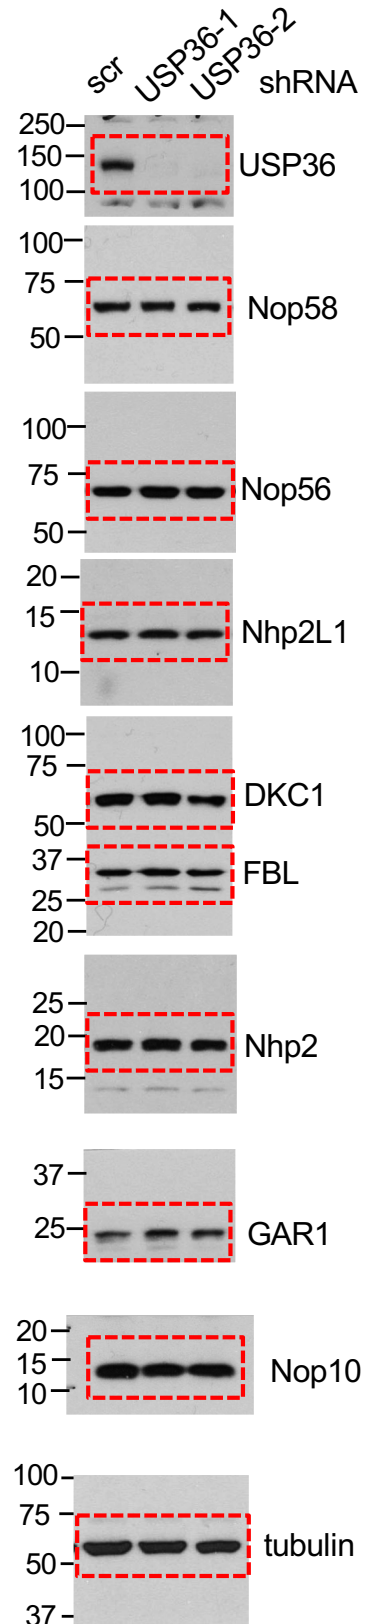

Supplement: EMBR-22-e50684-s001.pdf [file EMBR-22-e50684-s001.pdf]
