# Supplementary material
Source: PubMed Central journal article supplement (PMC8183414)

# Source Data for Figure 1

## Figure 1A

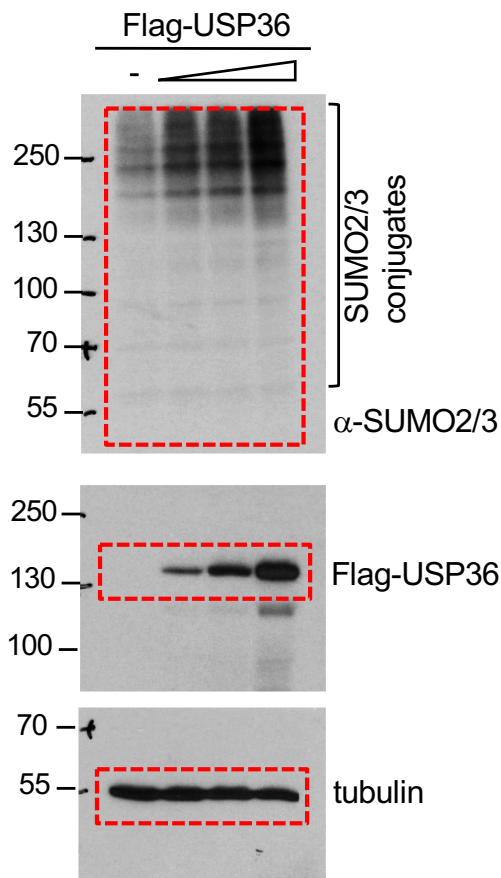

## Figure 1B

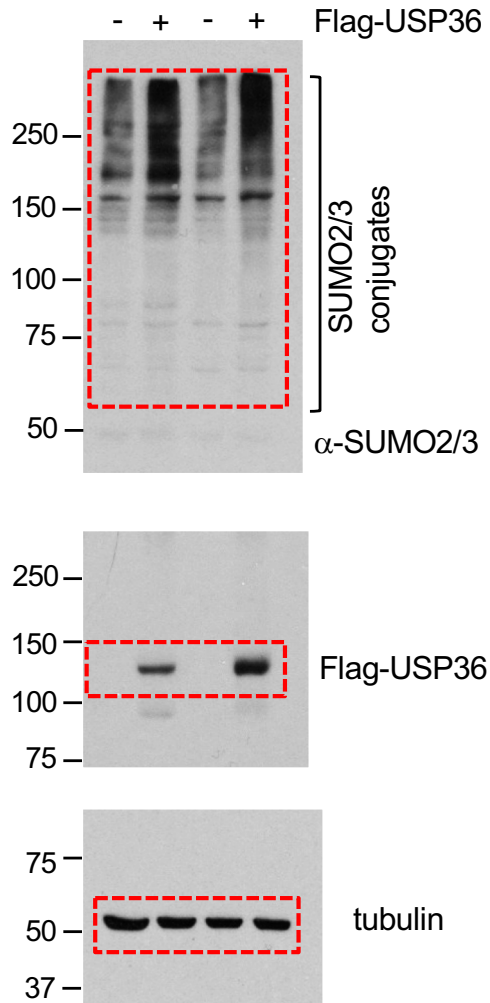

## Figure 1C

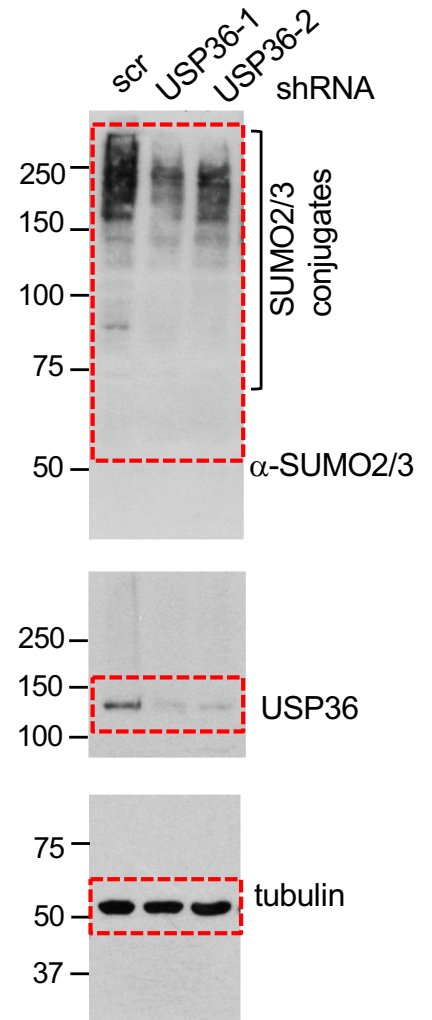

# Source Data for Figure 1

## Figure 1D

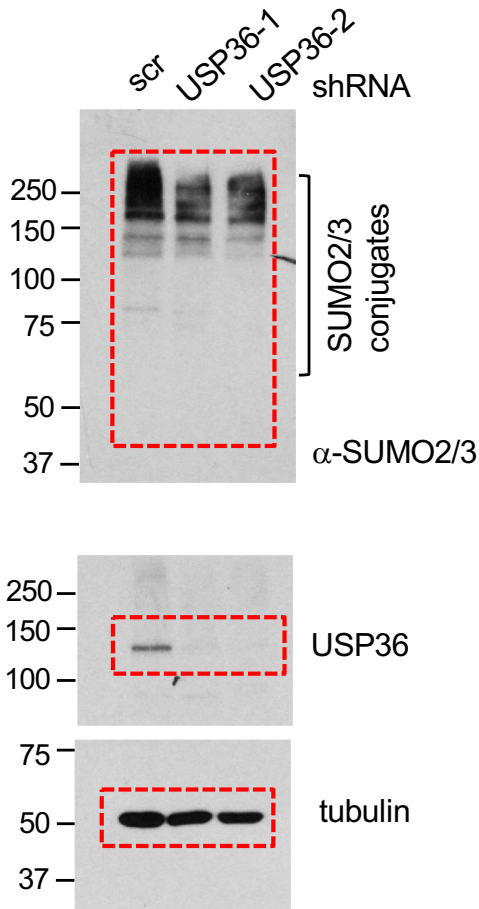

## Figure 1E

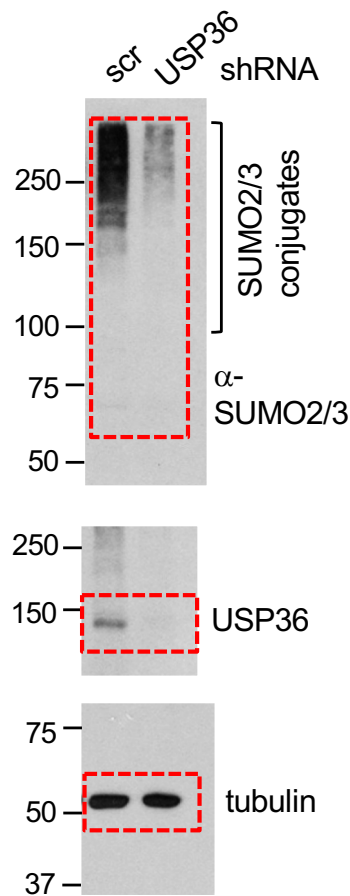

## Figure 1F

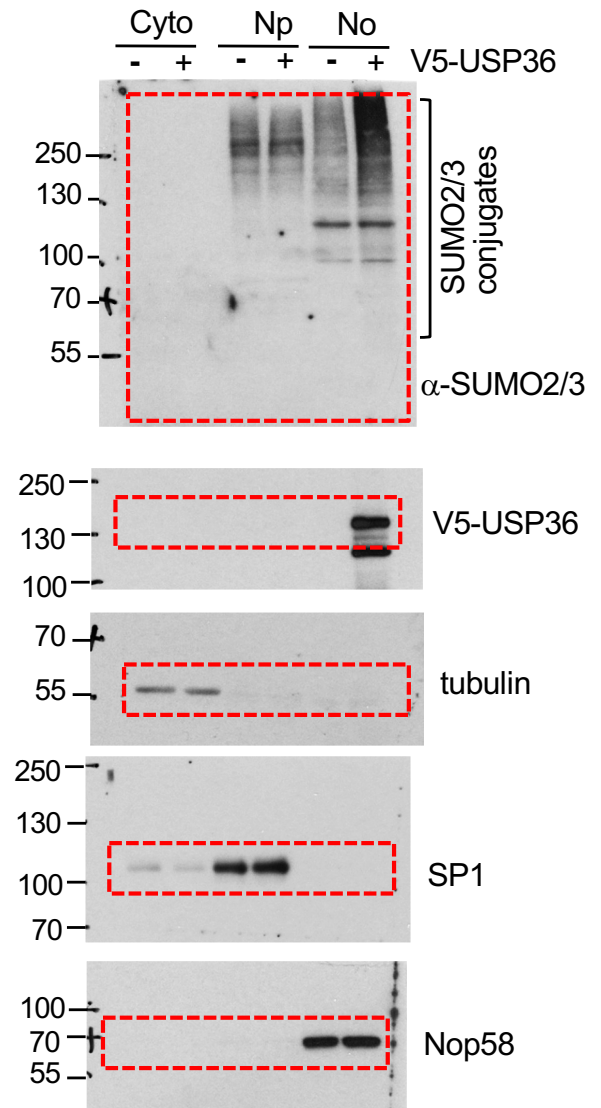

Supplement: EMBR-22-e50684-s005.pdf [file EMBR-22-e50684-s005.pdf]
