# Supplementary material
Source: PubMed Central journal article supplement (PMC8183414)

# Source Data for Figure 6

**Figure 6B**

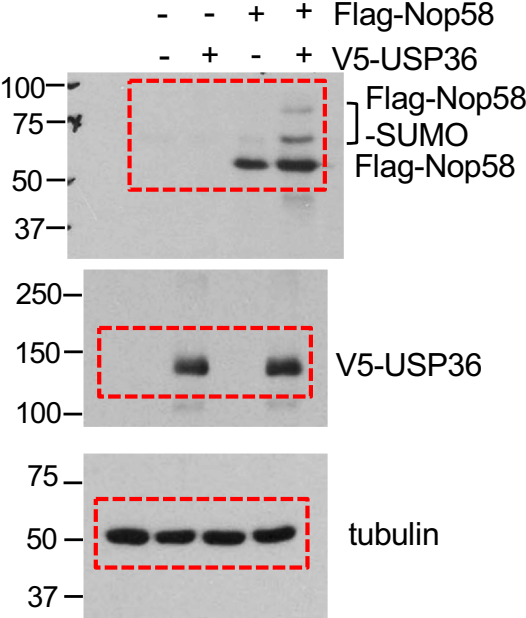

**Figure 6D**

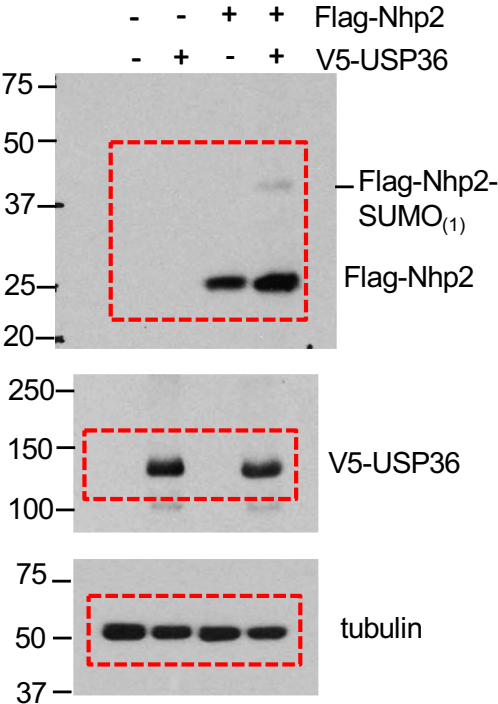

Supplement: EMBR-22-e50684-s002.pdf [file EMBR-22-e50684-s002.pdf]

# Source Data for Figure 3

## Figure 3A

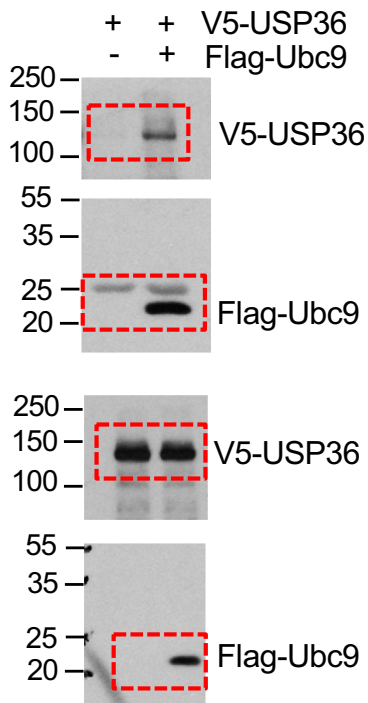

## Figure 3B

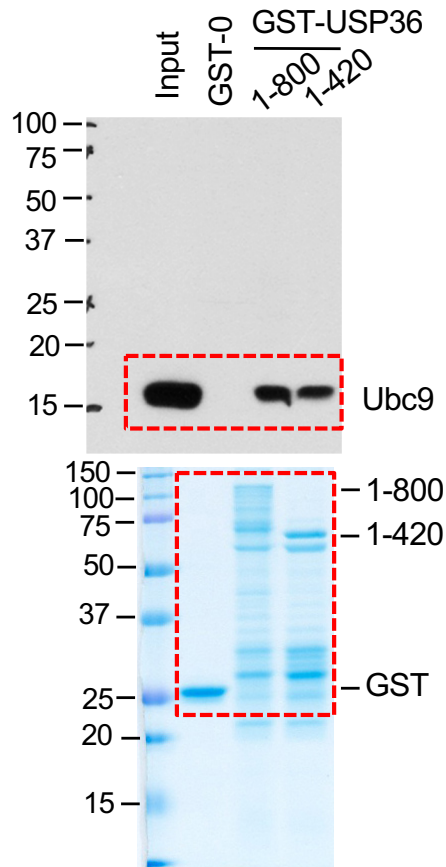

## Figure 3C

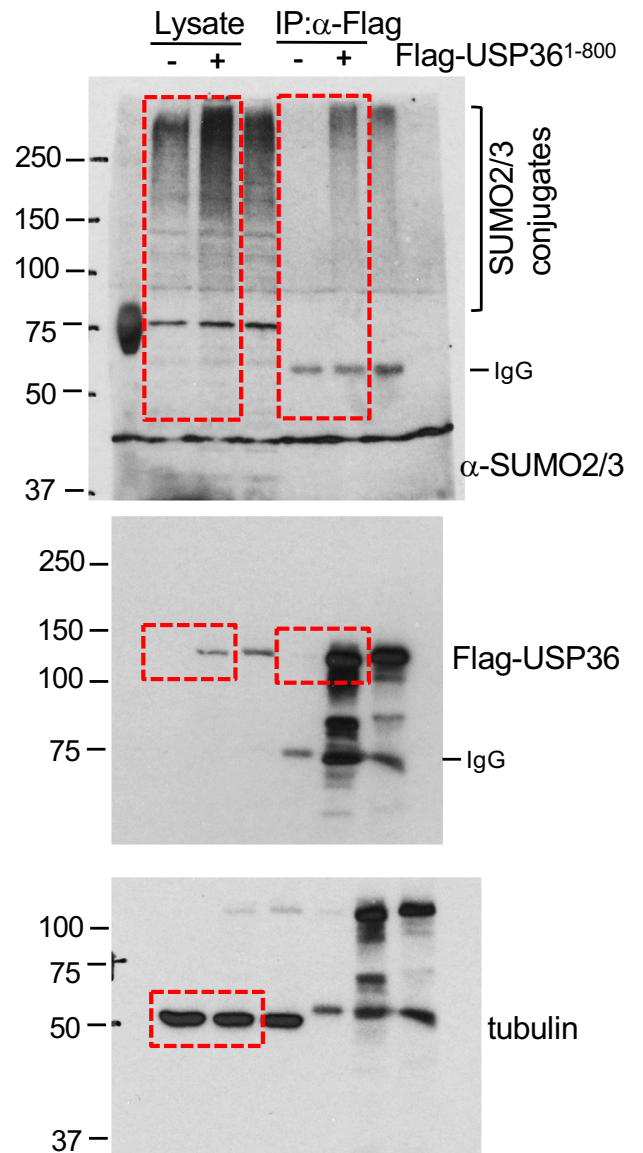

# Source Data for Figure 3

## Figure 3D

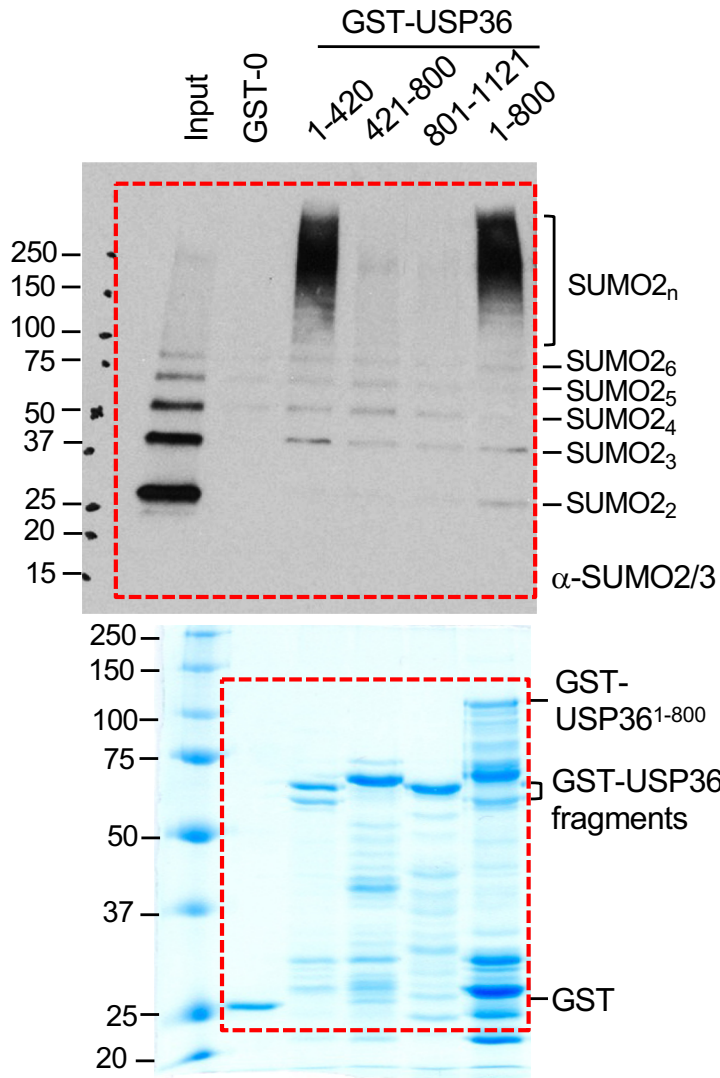

## Figure 3E

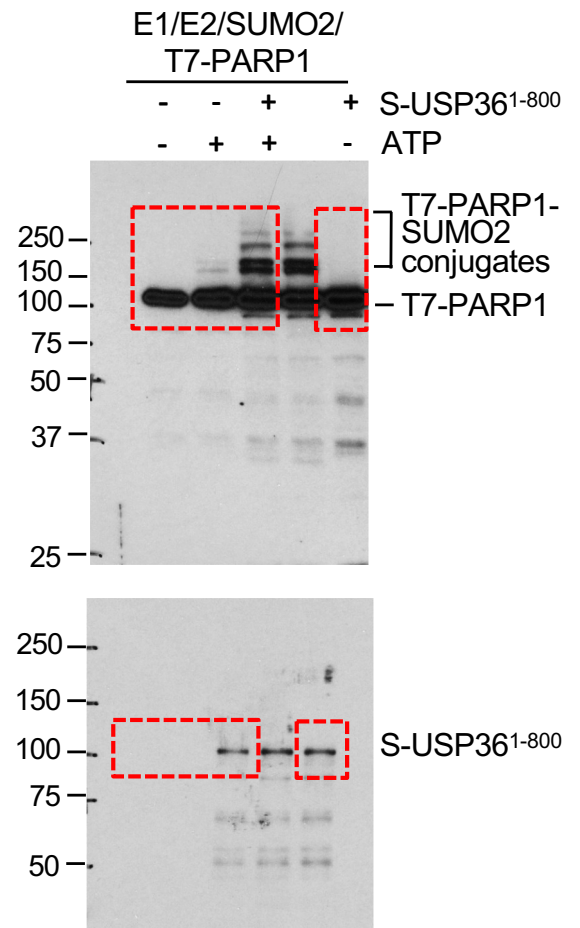

Supplement: EMBR-22-e50684-s003.pdf [file EMBR-22-e50684-s003.pdf]

# Source Data for Figure 7

## Figure 7B, left

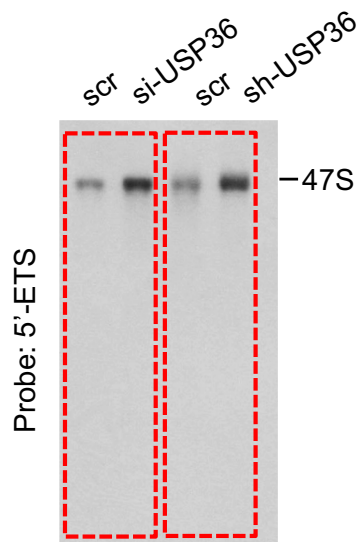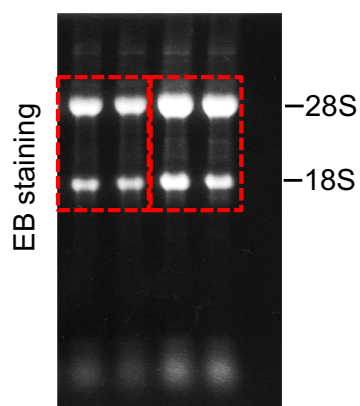

## Figure 7B, middle

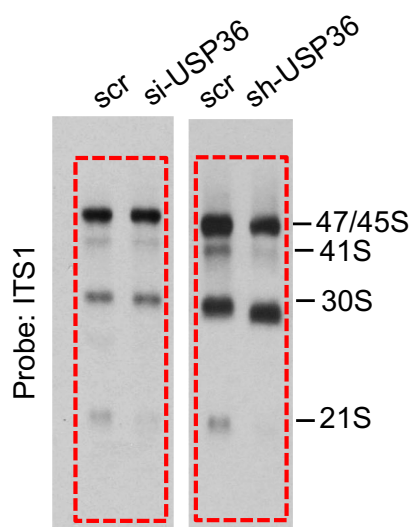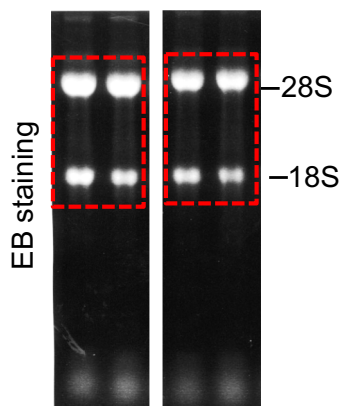

## Figure 7B, right

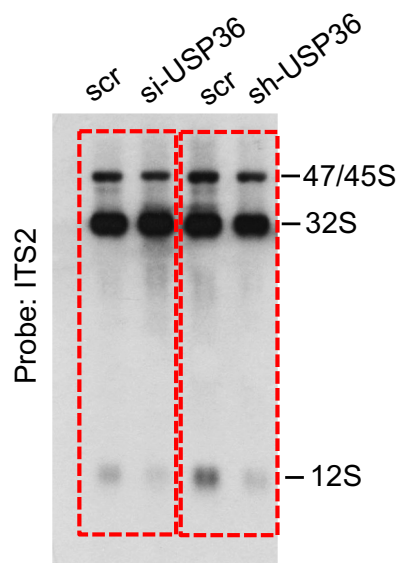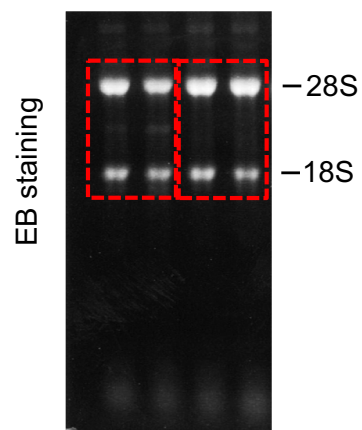

Supplement: EMBR-22-e50684-s008.pdf [file EMBR-22-e50684-s008.pdf]

# Source Data for Figure 2

## Figure 2A

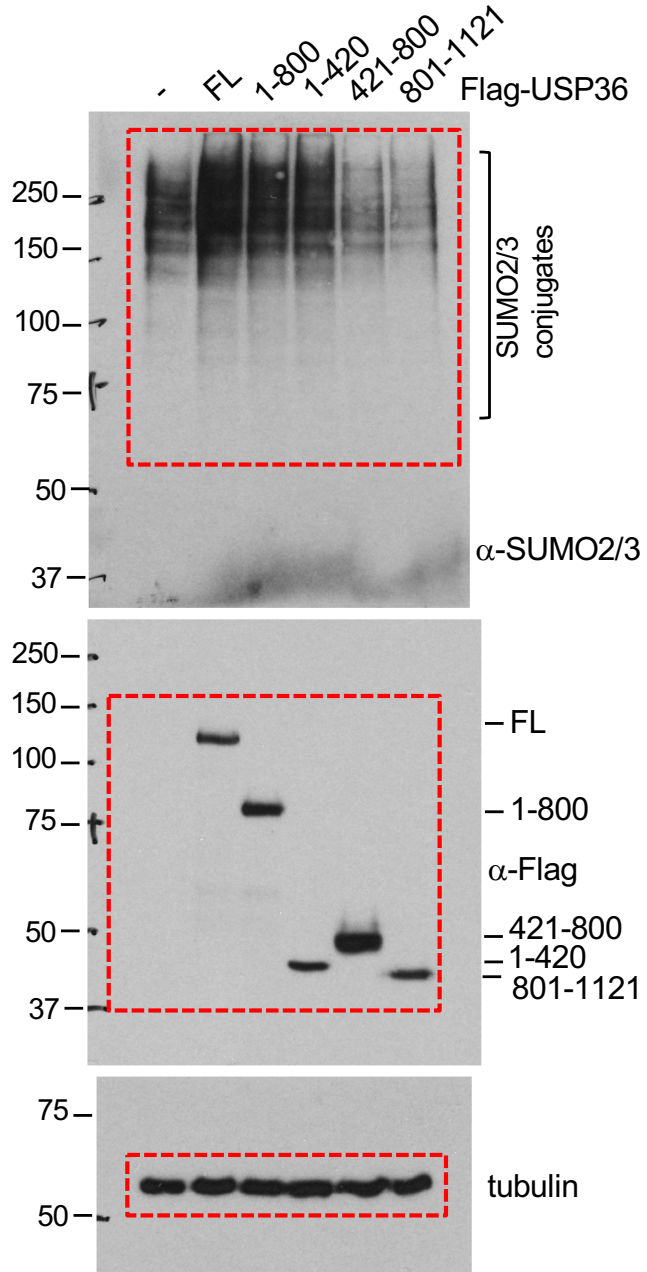

## Figure 2C

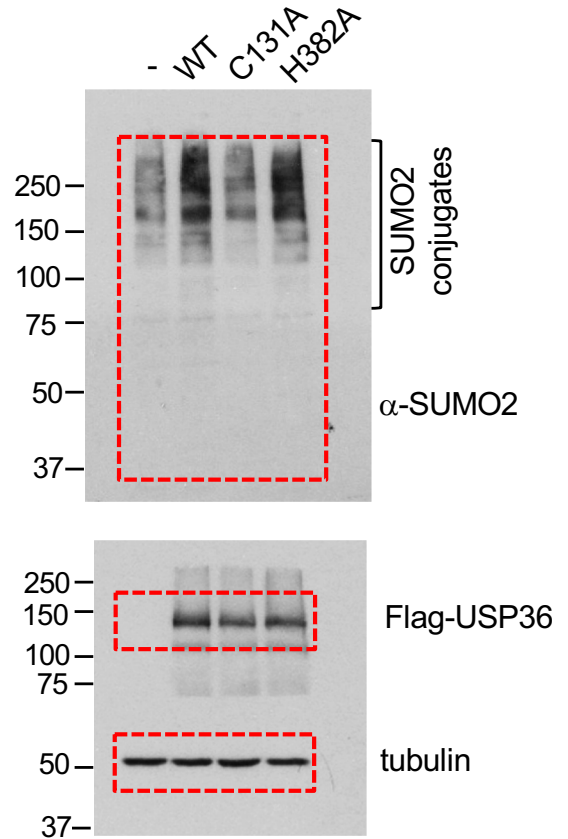

# Source Data for Figure 2

## Figure 2D

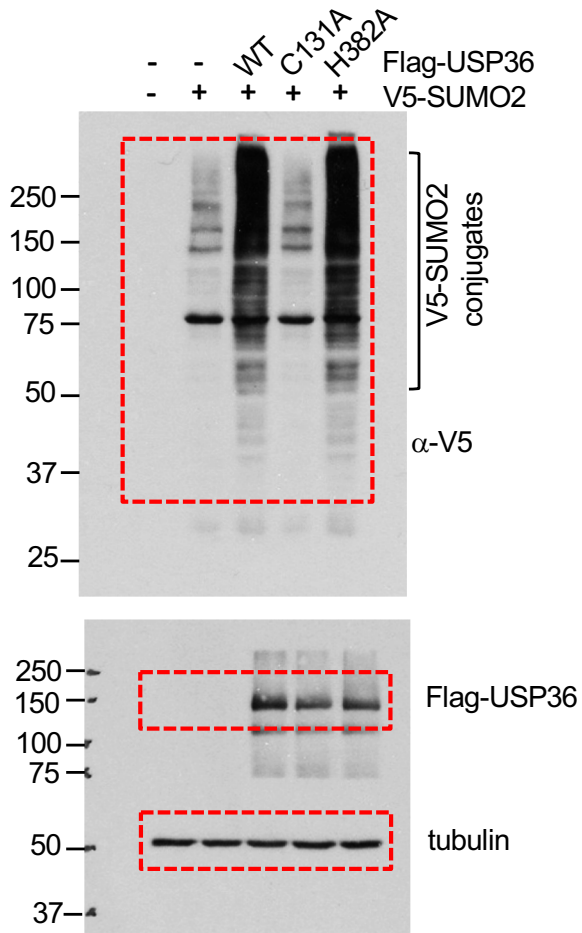

## Figure 2E

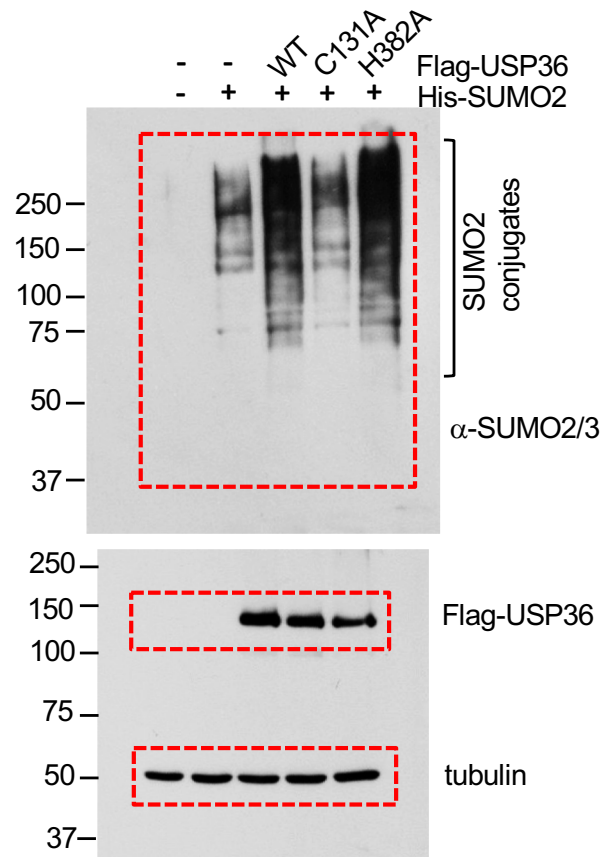

Supplement: EMBR-22-e50684-s009.pdf [file EMBR-22-e50684-s009.pdf]

# Source Data for Figure 4

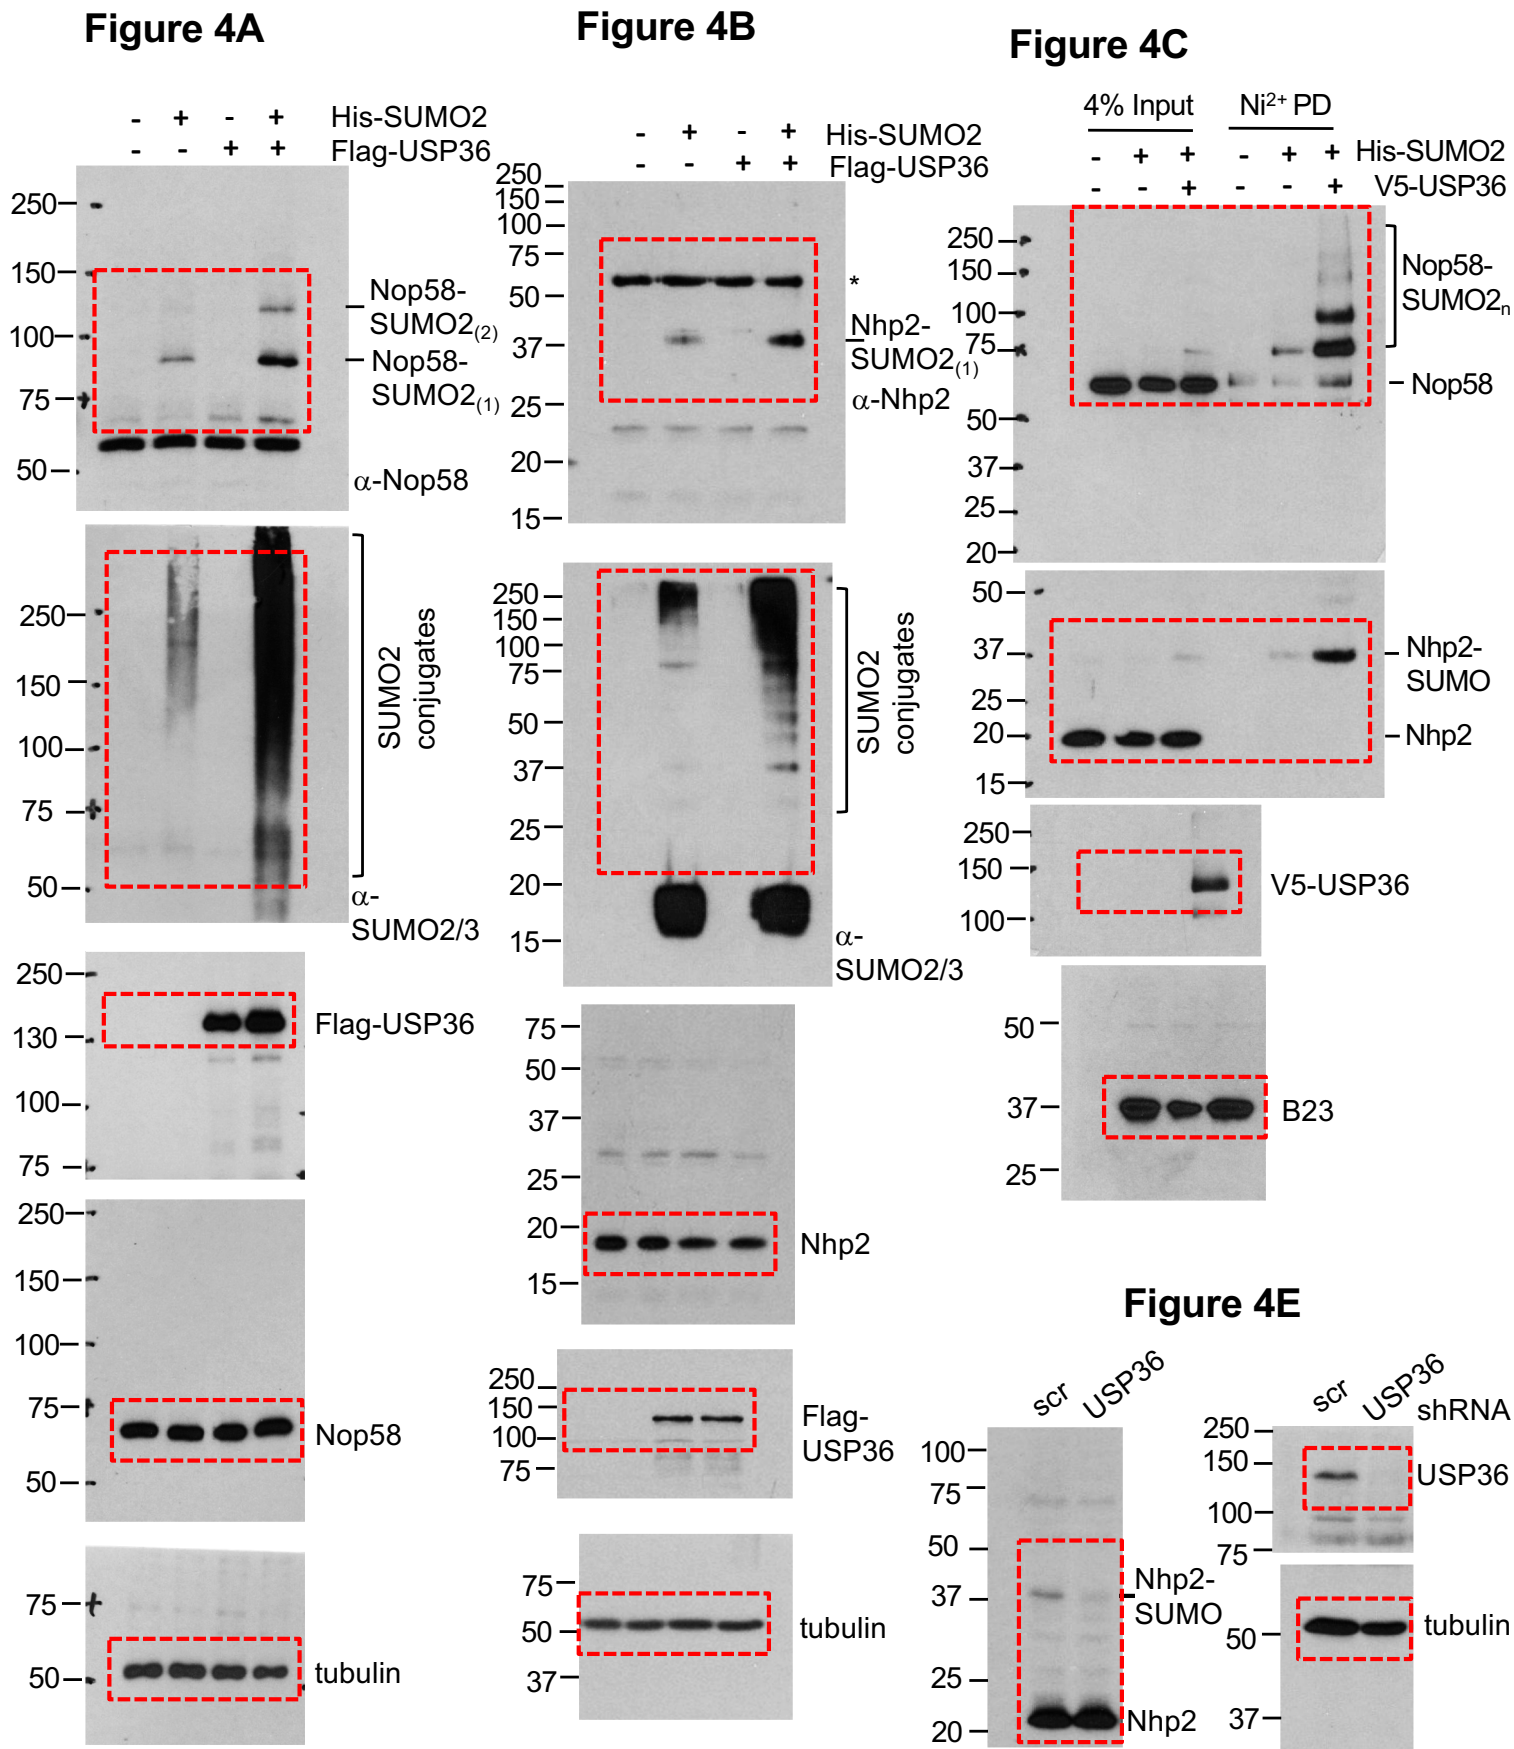

# Source Data for Figure 4

## Figure 4D

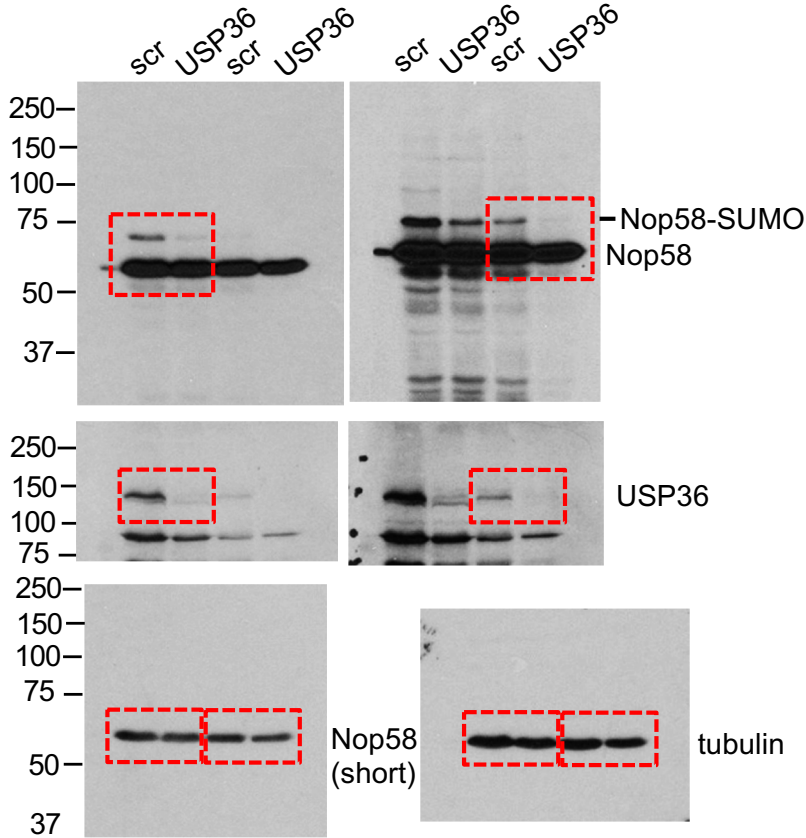

## Figure 4F

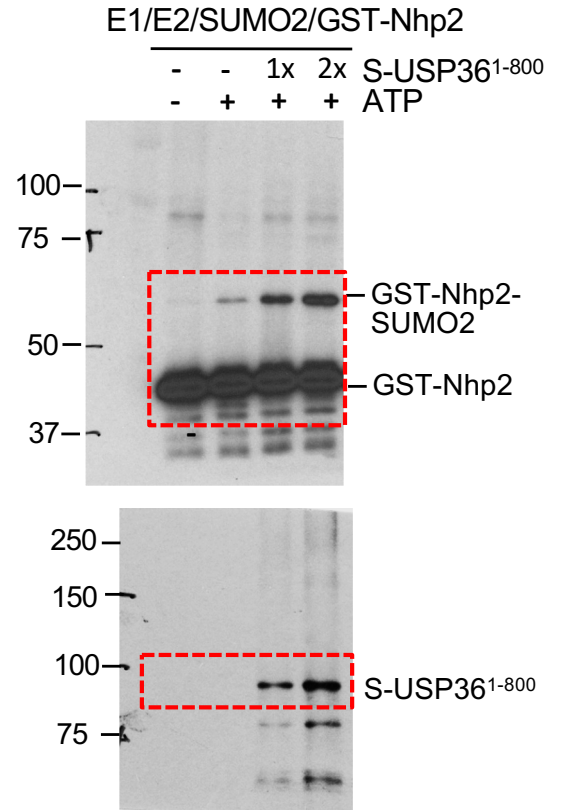

## Figure 4G

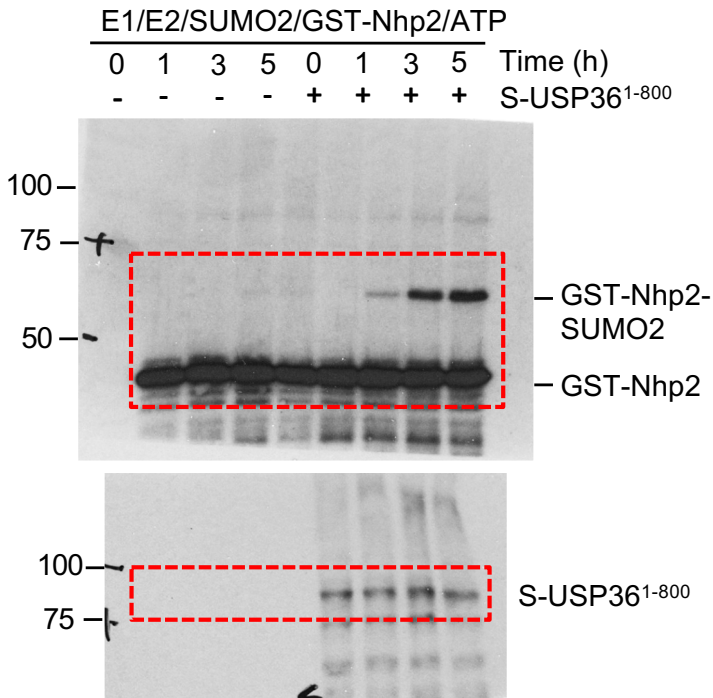

## Figure 4H

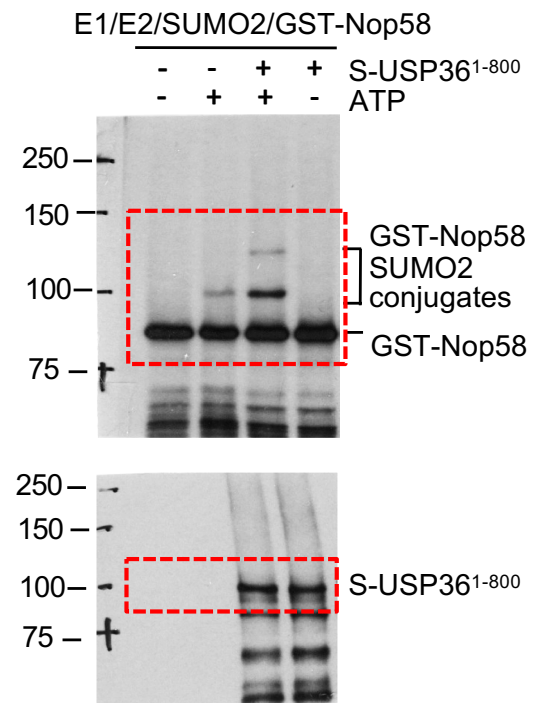

Supplement: EMBR-22-e50684-s011.pdf [file EMBR-22-e50684-s011.pdf]
